# Supplementary material
Source: publisher figshare collection journal article supplement (https://acs.figshare.com/ndownloader/files/4635601)
Supplement: Supplementary file 1 [file 4635601]

# SUPPORTING INFORMATION

## Insulin Analogs with Modifications at Position B26.

### Divergence of Binding Affinity and Biological Activity.

*Lenka Žáková<sup>1</sup>, Ludmila Kazdová<sup>2</sup>, Ivona Hančlová<sup>1</sup>, Eva Protivínská<sup>1</sup>, Miloslav Šanda<sup>1</sup>,*

*Miloš Buděšínský<sup>1</sup> and Jiří Jiráček<sup>1\*</sup>*

<sup>1</sup>Institute of Organic Chemistry and Biochemistry, Academy of Sciences of the Czech Republic, Flemingovo nám. 2, 166 10 Praha 6, Czech Republic

<sup>2</sup>Institute for Clinical and Experimental Medicine, Vídeňská 1958/9, 140 21 Praha 4, Czech Republic

zakova@uochb.cas.cz, [\\*jiracek@uochb.cas.cz](mailto:jiracek@uochb.cas.cz)

#### **Binding affinity of [D-AlaB26]-insulin and of human insulin.**

[D-AlaB26]-insulin analog was prepared according to the methodology described in the main manuscript. The binding affinities of [D-AlaB26]-insulin and of human insulin (Table) were determined in a separate experiment using the methodology described in the main manuscript. The binding curves are shown in Figure. The relative binding affinity of the analogue [D-AlaB26]-insulin, 17% compared to human insulin, is in a very good agreement with the result of Kurapkat et al. (1) who published 18% potency. This result again shows that substitutions, which give very potent DTI-NH<sub>2</sub> analogs, [NMeAlaB26]-DTI-NH<sub>2</sub> (this study) or [D-AlaB26]-DTI-NH<sub>2</sub> (1), do not result in potent full length analogs.

**Table.** Values of  $IC_{50}^a$  and relative receptor binding affinities of human insulin and [D-AlaB26]-insulin. The experimental values were determined with  $^{125}I$ -monoiodotyrosylA14-insulin.

| Peptide            | $IC_{50}^a \pm SEM$ [nM] ( <i>n</i> ) | potency <sup>b</sup> [%] |
|--------------------|---------------------------------------|--------------------------|
| Human insulin      | $0.79 \pm 0.08$                       | (6) 100                  |
| [D-AlaB26]-insulin | $4.66 \pm 0.41$                       | (5) 17                   |

<sup>a</sup> $IC_{50}$  values represent concentrations of insulin or the analog that cause half-maximal inhibition of binding of human  $^{125}I$ -monoiodotyrosylA14-insulin to the insulin receptor. Each value represents the mean  $\pm$  SEM of multiple determinations (*n*).

<sup>b</sup>Relative receptor binding affinity is defined as ( $IC_{50}$  of human insulin/ $IC_{50}$  of analog) x 100.

**Figure.** Inhibition of binding of human  $^{125}I$ -insulin to adipose plasma membranes by human insulin (■) and [D-AlaB26]-insulin (●). Quantitative information is provided in Table.

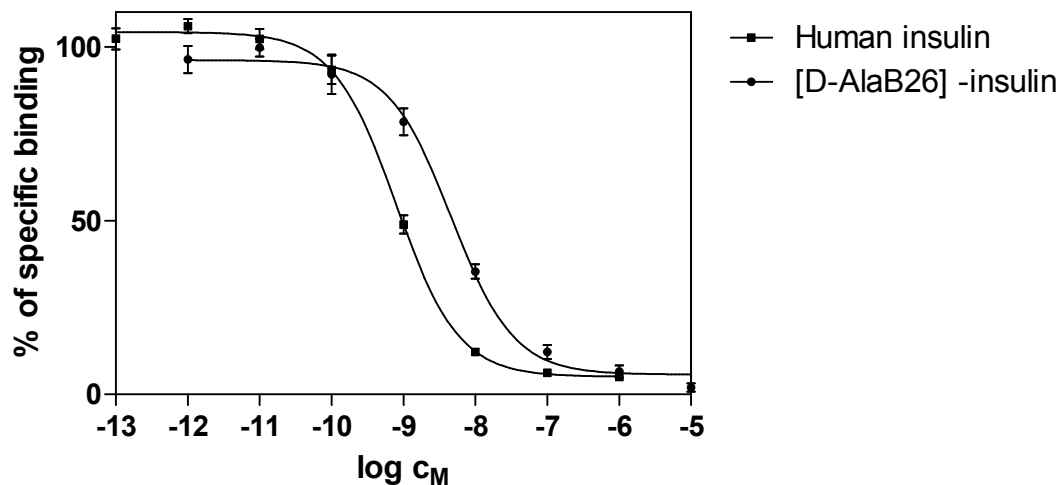

#### Reference

1. Kurapkat G., Siedentop M., Gattner H.-G., Hagelstein M., Brandenburg D., Grötzinger J. and Wollmer A., *Protein Sci.* **8**, 499-508 (1999).
